# Supplementary material for: Sensitivity of young water fractions to hydro-climatic forcing and landscape properties across 22 Swiss catchments
Source: Copernicus journal article supplement (doi:10.5194/hess-22-3841-2018), 2018-07-19
Supplement: Supplementary file 1 [file hess-22-3841-2018-supplement.zip]

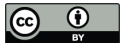

## *Supplement of*

# **Sensitivity of young water fractions to hydro-climatic forcing and landscape properties across 22 Swiss catchments**

**Jana von Freyberg et al.**

*Correspondence to:* Jana von Freyberg ([jana.vonfreyberg@usys.ethz.ch](mailto:jana.vonfreyberg@usys.ethz.ch))

- [hess-22-3841-2018-supplement-title-page.pdf](#)
- [hess-2017-720\\_Supplement\\_2\\_final](#)
  - [.DS\\_Store](#)
  - [IRLS\\_hess-2017-720.R](#)
  - [hess-2017-720\\_Supplement.pdf](#)

The copyright of individual parts of the supplement might differ from the CC BY 4.0 License.
